# Supplementary material for: Achieving enhanced solid-state photochromism and mechanochromism by introducing a rigid steric hindrance group
Source: Royal Society of Chemistry journal article supplement (doi:10.1039/d1cp02983e), 2021-01-01
Supplement: d1cp02983e1.pdf [file d1cp02983e1.pdf]

### Supporting Information

#### **Achieving enhanced solid-state reversible photochromism and mechanochromism by introducing a rigid steric hindrance group**

*Junzhao He, <sup>a,†</sup> Huimin Zhao, <sup>a,†</sup> Han Wu, <sup>a</sup> Yuhui Yang, <sup>\* a,b,c</sup> Zhaoxun Wang, <sup>a</sup> Zhe He <sup>a</sup>, Guohua Jiang*

*a,b,c*

<sup>a</sup> College of Materials Science and Engineering, Zhejiang Sci-Tech University, Hangzhou 310018,

China

<sup>b</sup> Department of Polymer Materials, Zhejiang Sci-Tech University, Hangzhou 310018, China

<sup>c</sup> Institute of Smart Biomedical Materials, Zhejiang Sci-Tech University, Hangzhou 310018, China.

\* Corresponding authors, E-mail address: yhyang@zstu.edu.cn (Y.Y)

## **Materials and Measurements**

All the solvents and reactants were purchased from commercialized companies (J&K Chemicals and Aladdin, Analytical) and used as received without further purification except for specifying otherwise.

Thin layer chromatography (TLC) was performed on Yantai chemical industry silica gel plates. Column chromatography was performed using silica gel 200-300 mesh.

$^1\text{H}$  NMR and  $^{13}\text{C}$  NMR spectra were with a BRUKER AVANCE AV400MHz ( $^1\text{H}$ : 400 MHz;  $^{13}\text{C}$ : 100MHz) spectrometer at room temperature. Fluorescence spectra were conducted by using a fluorescence spectrophotometer (F-46001, HITACHI, Japan). UV-vis spectra were measured on a spectrometer (TU-1901, PERSEE, China). Thermogravimetric analyzer was performed with a PYRIS 1 (PerkinElmer, USA). Mass spectrometry (MS) was performed with a XEVO-G2STOF (ESI) (Waters, USA). The surface morphology was tested with a Carl Zeiss SMT Pte Ltd ultra55 (Germany) SEM at an accelerating voltage of 3 kV.

## **Computational methods**

The ground state geometries were fully optimized by the density functional theory (DFT) method with the Becke three-parameter hybrid exchange and the Lee-Yang-Parr correlation functional (B3LYP) and 6-31G(d) basis set using the Gaussian 09 software package.

## **Synthesis**

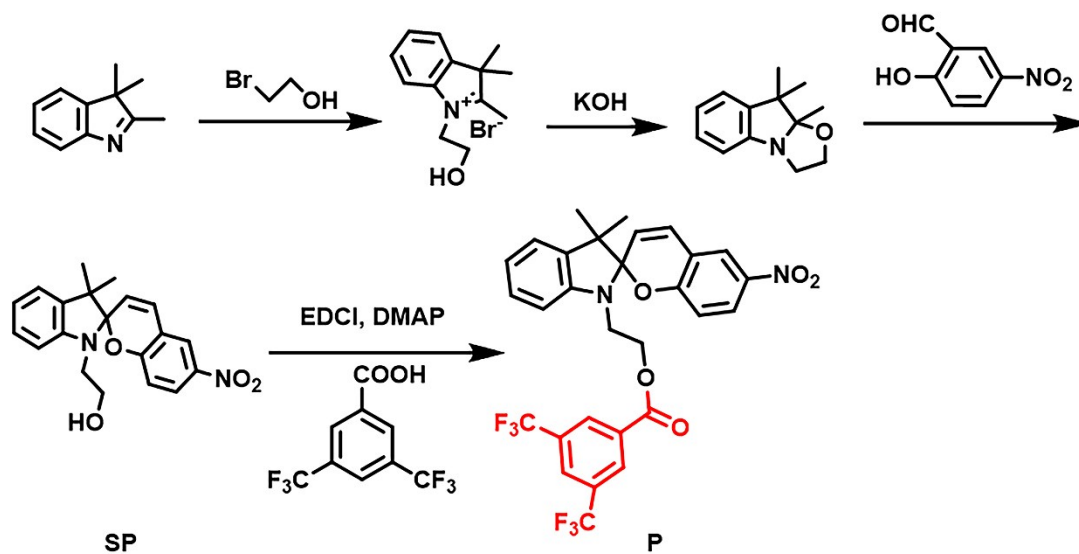

**Scheme S1.** Synthetic scheme for P.

**Synthesis of compound SP.** The compound SP was synthesized using modified procedures based on literature.<sup>1</sup> The PXRD spectra of SP (Figure S7) is same as the reported<sup>2</sup> and it prove that the structure of the molecule we synthesized is spiroopyran form.

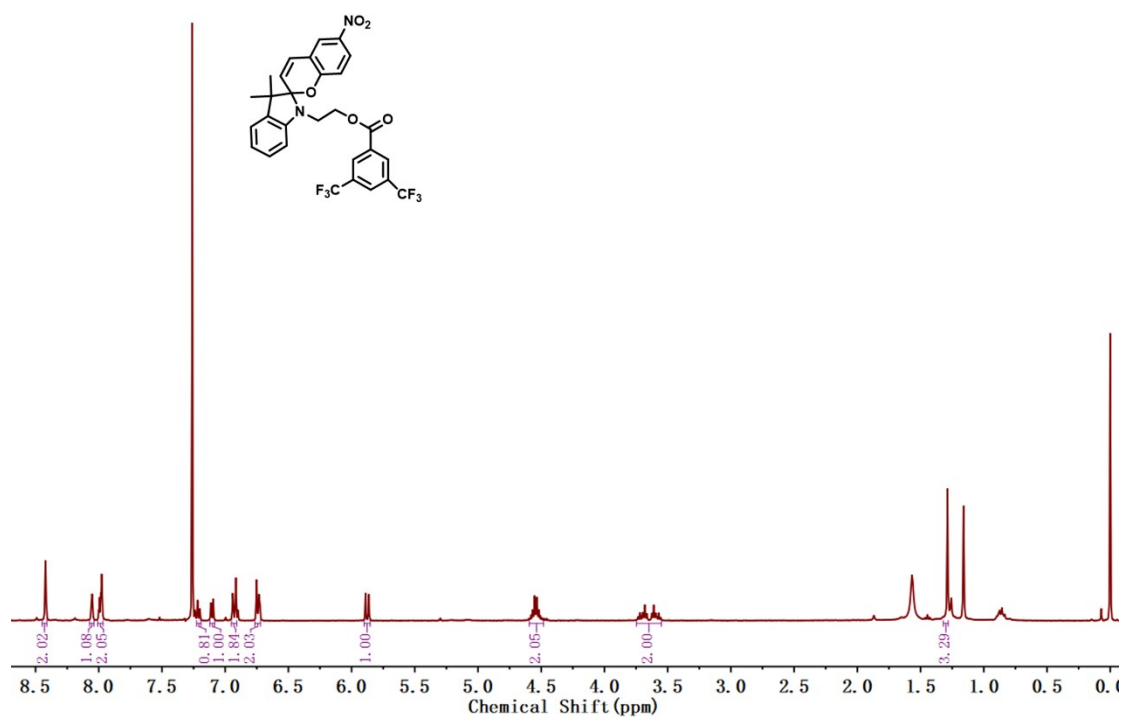

**Figure S1.** <sup>1</sup>H NMR spectrum of compound P in CDCl<sub>3</sub>

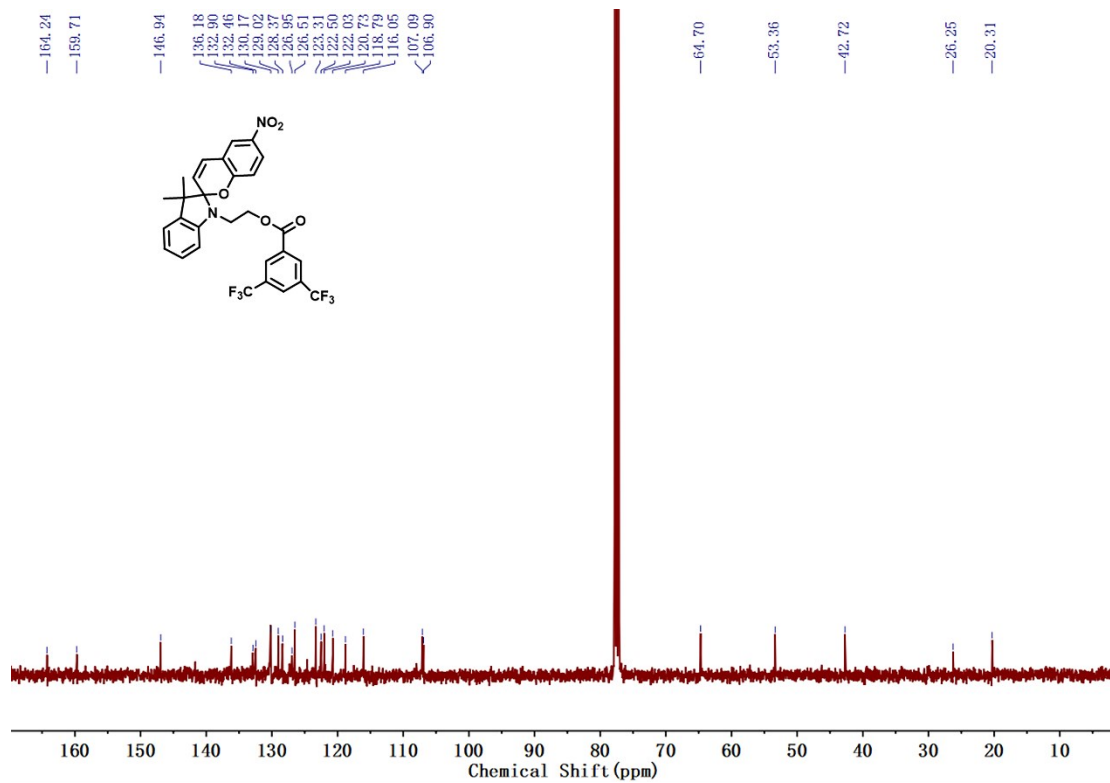

**Figure S2.**  $^{13}\text{C}$  NMR spectrum of compound P in  $\text{CDCl}_3$

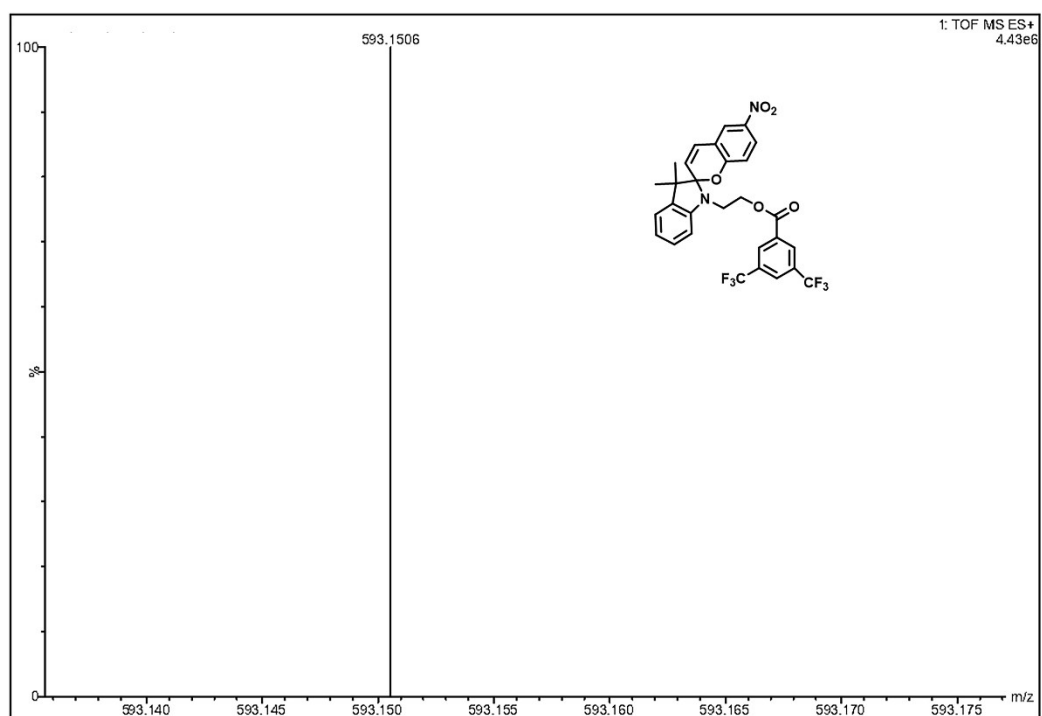

**Figure S3.** ESI-MS spectrum of compound P

**Preparation of the PVP Film.** P (SP) (10 mg) was dissolved in 0.5 mL of dibromoethane, followed

by the addition of PVP (40 mg). after stirring for 24 h at room temperature, a yellow transparent viscous solution was obtained. The resulting solution was filtered through a 0.2  $\mu\text{m}$  PTFE filter and spin coated onto glass substrates to obtain the films. In order to remove the residual solvent, these obtained films were baked in a vacuum oven.

**Table S1.** Fluorescence quantum yield of P in powder and solution before and after 365 nm UV irradiation.

|                       | Powder | Solution |
|-----------------------|--------|----------|
| Before UV irradiation | 3.59%  | 9.68%    |
| After UV irradiation  | 5.54%  | /        |

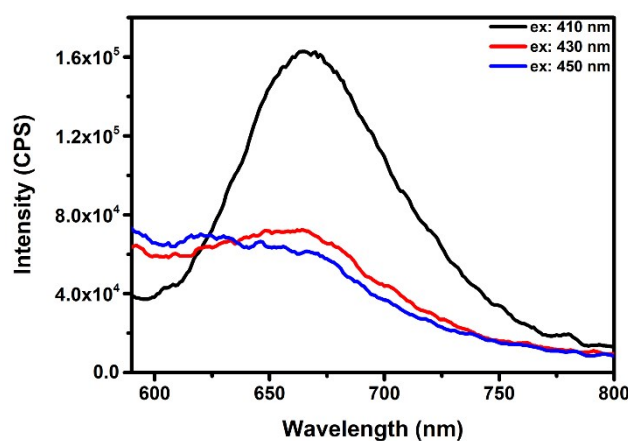

**Figure S4.** Fluorescence spectra of P by different excitation wavelength. Ex: 410 nm, 430 nm, 450 nm.

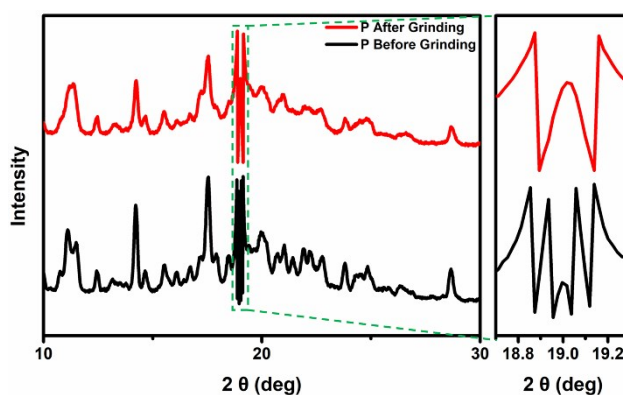

**Figure S5.** PXRD spectra of P powder before and after grinding.

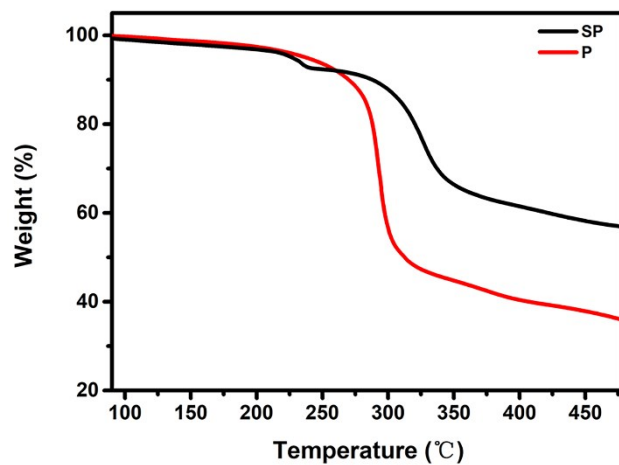

**Figure S6.** TGA curves of SP and P.

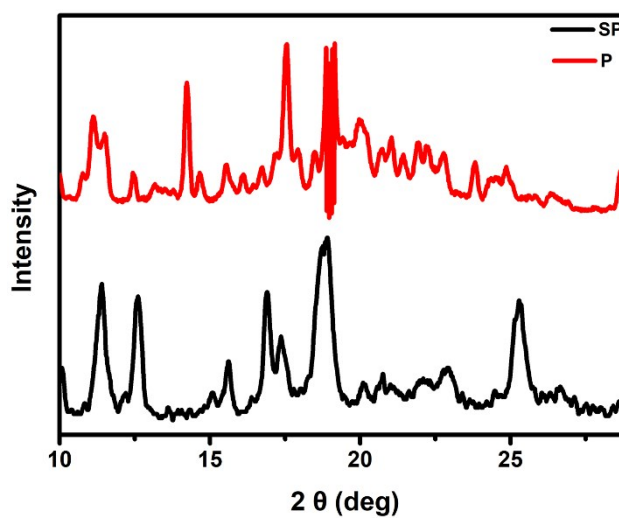

**Figure S7.** PXRD spectra of SP and P powder

## References

1. G. O'Bryan, B. M. Wong and J. R. McElhanon, *ACS Appl. Mater. Interfaces*, 2010, **2**, 1594-1600.
2. V. M. Breslin and M. A. Garcia-Garibay, *Crystal Growth & Design*, 2017, **17**, 637-642.
